- to the Lee-White coagulation time. *Am J Clin Pathol* 50: 403-407, 1968
6. Jaberli M, Bell WR, Benson DW: Control of heparin therapy in open-heart surgery. *J Thorac Cardiovasc Surg* 67:133-141, 1974
  7. Reno WJ, Rotman M, Grumbine FC, et al: Evaluation of the BART test (a modification of the whole-blood activated recalcification time test) as a means of monitoring heparin therapy. *Am J Clin Pathol* 61:78-84, 1974
  8. Soloway JB, Cornett BM, Donahoo JV, et al: Differentiation of bleeding diatheses which occur following protamine correction of heparin anticoagulation. *Am J Clin Pathol* 60: 188-191, 1973
  9. Schriver HG, Epstein SE, Mintz M: Statistical correlation and heparin sensitivity of activated partial thromboplastin time, whole blood coagulation time and an automated coagulation time. *Am J Clin Pathol* 60:323-329, 1973
  10. Bowie EJW, Thompson JH Jr, Didisheim P, et al: *Mayo Clinic Laboratory Manual of Hemostasis*. Philadelphia, W.B. Saunders Co., 1971, 186 pp
  11. Hattersley PG: Activated coagulation time of whole blood. *JAMA* 196:436-444, 1966
  12. Bull BS, Huse WM, Brauer FS, et al: Heparin therapy during extracorporeal circulation. The use of a dose response curve to individualize heparin and protamine dosage. *J Thorac Cardiovasc Surg* 69:685-689, 1975
  13. Ellison N, Beatty CP, Blake DR, et al: Heparin rebound. *J Thorac Cardiovasc Surg* 67:723-729, 1974
  14. Novak E, Sekhar NC, Dunham NW, et al: Comparative study of the effect of lung and gut heparins on platelet aggregation and protamine neutralization in man. *Clin Med* 75: 22-27, 1972
  15. Jacques LB, Bell HJ: Determination of heparin. *Methods Biochem Anal* 7:253-309, 1959
  16. Senn LY, Karlson KE: Methodologic and actual error of plasma volume determination. *Surgery* 44: 1095-1105, 1958
  17. Altschuler JH, Altschuler TL, Halseth WL, et al: Hemostasiometry. A new technique for the study of hemostasis in open-heart surgery. *FIEE Trans Biomed Engr BME-20:152-154, 1973*

### Malignant Hyperthermia

**CURARE AND HYPERTHERMIA** A number of investigators have claimed that it is probably safe to administer *d*-tubocurarine to a patient susceptible to malignant hyperthermia (MH). This report details the anesthetic management of two patients with a strong family history of MH. A 13-year-old Caucasian boy required surgery to correct bowel obstruction. Although he had no history of muscle abnormalities, 20 of his relatives had had non-rigid MH; eight had died in the perioperative period. The patient was premedicated with atropine and chlorpromazine; during a period of preoperative prophylactic cooling, he received meperidine, chlorpromazine, and promethazine. Rectal temperature was 36.1 C immediately prior to induction of anesthesia with nitrous oxide and oxygen, which was followed by intravenous injection

of *d*-tubocurarine. Within five minutes after the administration of *d*-tubocurarine, rectal temperature was 39.7 C. The patient was treated by external cooling and no further *d*-tubocurarine was given. An uneventful recovery ensued. The second patient (with a strong family history of rigid MH) developed a rectal temperature of 40.6 C within 15 minutes after administration of *d*-tubocurarine. Neither patient manifested rigidity at any time. Serum CPK determinations performed several months after the two incidents were normal or minimally elevated. (Britt BA, and others: *Malignant hyperthermia induced by curare*. *Can Anaesth Soc J* 21:37-375, 1974.) **ABSTRACTER'S COMMENT:** What about the possibility that N<sub>2</sub>O was the triggering agent?
